# Supplementary material
Source: publisher figshare collection journal article supplement (https://geolsoc.figshare.com/ndownloader/files/15683345)
Supplement: Supplementary file 1 [file 15683345]

## Sheet: Sheet1
Run	Sample	Regolith	Impactor	Duration	Li	Be	Na	Mg	Al	Si	P	S	Cl	K	Ca	Sc	Ti	V	Cr	Mn	Fe	Co	Ni	Cu	Zn	Ga	Ge	As	Se	Br	Rb	Sr	Y	Zr	Nb	Mo	Ru	Rh	Pd	Ag	Cd	In	Sn	Sb	Te	I	Cs	Ba	La
	Unit				ppm	ppm	ppm	ppm	ppm	ppm	ppm	ppm	ppm	ppm	ppm	ppm	ppm	ppm	ppm	ppm	ppm	ppm	ppm	ppm	ppm	ppm	ppm	ppm	ppm	ppm	ppm	ppm	ppm	ppm	ppm	ppm	ppm	ppm	ppm	ppm	ppm	ppm	ppm	ppm	ppm	ppm	ppm	ppm	ppm
	Detection Limit				50	0.05	10	1	2	2000	100	1000	100	10	1000	0.2	5	0.2	0.5	2	5	0.05	0.1	2	0.5	0.02	0.05	0.2	1	10	0.1	0.005	0.005	0.01	0.005	0.01	0.05	0.01	0.02	0.02	0.1	0.005	0.1	0.05	0.2	5	0.02	0.05	0.005
1	Filter paper				-50	-0.05	60	34	74	-2000	-100	-1000	200	20	2000	0.4	-5	-0.2	83	-2	200	0.1	1.5	2	54	0.02	-0.05	-0.2	-1	-10	-0.1	1.39	0.025	5.84	0.03	0.09	-0.05	-0.01	-0.02	0.06	0.4	-0.005	0.2	-0.05	-0.2	-5	-0.02	0.4	0.04
1	Filter paper				-50	-0.05	20	15	20	-2000	-100	-1000	-100	20	1000	0.4	-5	-0.2	513	-2	160	-0.05	1.4	-2	8	-0.02	-0.05	-0.2	-1	-10	-0.1	0.975	-0.005	0.03	0.03	0.02	-0.05	-0.01	-0.02	-0.02	-0.1	0.03	0.1	0.1	-0.2	-5	-0.02	0.7	0.005
1	Filter paper				-50	-0.05	10	14	76	-2000	-100	-1000	-100	30	1000	0.4	-5	-0.2	35.5	-2	45	0.05	1.2	-2	13.5	-0.02	-0.05	-0.2	-1	-10	-0.1	0.91	-0.005	0.03	0.025	0.03	-0.05	-0.01	-0.02	-0.02	-0.1	-0.005	-0.1	0.05	-0.2	-5	-0.02	0.3	0.01
1	141241	Fe-rich sheetwash	10	30	900	3.05	4220	6544	119588	256000	1900	2000	4900	20590	4000	18.4	8935	195.6	264	2510	99190	54.25	62.4	52	173	33.5	2.25	14.4	1	20	147.2	67.845	15.695	94.88	31.475	5.51	-0.05	-0.01	0.08	0.3	0.2	0.13	5.1	2.05	-0.2	40	10.24	413.35	36.94
1	141241	Fe-rich sheetwash	10	30	50	3.2	4620	4750	129080	252000	2200	2000	5200	19290	5000	14.6	7935	191.8	355.5	3282	97670	44.65	57.7	58	188	33.78	2.3	15.6	4	20	162.3	43.905	27.645	606.42	22.51	2.47	-0.05	-0.01	-0.02	0.08	-0.1	0.12	10.8	1.8	-0.2	35	10.28	348.1	31.415
1	141241	Fe-rich sheetwash	10	30	-50	2.35	3860	6325	136050	250000	2200	2000	6400	19040	9000	14.6	8020	189.6	604	1968	84675	39.65	48	50	182.5	30.4	1.9	15.6	3	-10	136.2	59.76	20.885	154.43	30.35	1.78	-0.05	-0.01	-0.02	0.12	0.3	0.09	4.8	1.6	-0.2	35	10.16	300.1	63.215
	Detection Limit				100	0.1	50	1	5	5000	200	1000	100	10	2000	0.5	20	0.5	1	2	20	0.2	0.5	0.5	0.5	0.05	0.05	0.5	1	10	0.05	0.05	0.05	0.1	0.05	0.05	0.05	0.005	0.01	0.02	0.1	0.02	0.1	0.2	0.5	2	0.05	0.2	0.05
2	141241	Fe-rich sheetwash	10	30	-100	2.7	3100	6179	125305	270000	1600	1000	4500	18460	2000	17.5	7860	193	262	3216	77340	46.2	46.5	43	128	30.8	1.9	11	1	-10	125.55	58.65	19.9	89.6	30.8	1.8	-0.05	-0.005	-0.01	0.06	0.1	0.08	4.8	1.2	-0.5	38	7.9	328.6	25.2
2	141241	Fe-rich sheetwash	10	30	-100	2.1	2950	6766	118220	275000	1600	-1000	5000	17740	4000	17.5	8340	173.5	460	2058	78700	45.8	45.5	52	119.5	29.1	2.1	11.5	2	-10	129.25	48.6	14.6	85.4	30.1	1.95	-0.05	-0.005	-0.01	0.12	0.2	0.08	4.4	1.2	-0.5	26	7.85	331.2	37.25
2	141241	Fe-rich sheetwash	10	30	-100	2.2	2250	4556	141070	260000	1600	2000	5300	19540	4000	20.5	9020	170	400	2332	72520	39.8	45	44	191	30.35	1.95	11	1	-10	112.15	53.45	16.25	118.6	21.7	2	-0.05	-0.005	-0.01	0.1	-0.1	0.12	4.3	1.2	-0.5	38	8.3	310.4	42.55
	Detection Limit				50	0.05	10	1	2	2000	100	1000	100	10	1000	0.2	5	0.2	0.5	2	5	0.05	0.1	2	0.5	0.02	0.05	0.2	1	10	0.1	0.005	0.005	0.01	0.005	0.01	0.05	0.01	0.02	0.02	0.1	0.005	0.1	0.05	0.2	5	0.02	0.05	0.005
1	Filter paper				-50	-0.05	60	34	74	-2000	-100	-1000	200	20	2000	0.4	-5	-0.2	83	-2	200	0.1	1.5	2	54	0.02	-0.05	-0.2	-1	-10	-0.1	1.39	0.025	5.84	0.03	0.09	-0.05	-0.01	-0.02	0.06	0.4	-0.005	0.2	-0.05	-0.2	-5	-0.02	0.4	0.04
1	Filter paper				-50	-0.05	20	15	20	-2000	-100	-1000	-100	20	1000	0.4	-5	-0.2	513	-2	160	-0.05	1.4	-2	8	-0.02	-0.05	-0.2	-1	-10	-0.1	0.975	-0.005	0.03	0.03	0.02	-0.05	-0.01	-0.02	-0.02	-0.1	0.03	0.1	0.1	-0.2	-5	-0.02	0.7	0.005
1	Filter paper				-50	-0.05	10	14	76	-2000	-100	-1000	-100	30	1000	0.4	-5	-0.2	35.5	-2	45	0.05	1.2	-2	13.5	-0.02	-0.05	-0.2	-1	-10	-0.1	0.91	-0.005	0.03	0.025	0.03	-0.05	-0.01	-0.02	-0.02	-0.1	-0.005	-0.1	0.05	-0.2	-5	-0.02	0.3	0.01
1	141241	Fe-rich sheetwash	1	30	350	2.4	3770	5352	122388	270000	700	1000	1500	19760	1000	15.8	7860	198	163	2950	95565	45.85	54.9	54	168.5	35.54	2.2	14.8	4	10	157.6	59.595	32.435	164.76	22.055	2.19	-0.05	-0.01	-0.02	0.12	0.2	0.13	5.5	1.35	-0.2	70	11.8	369.55	30.335
1	141241	Fe-rich sheetwash	1	30	150	2.6	4210	6312	135630	248000	800	1000	1500	19530	-1000	16.2	9800	204.4	151.5	3108	100780	46.15	52.6	54	166	35.88	2.35	14.8	1	20	150.7	60.705	28.505	157.85	21.7	2.35	-0.05	-0.01	-0.02	0.08	0.2	0.12	5.7	2.45	-0.2	45	11.08	383.65	45.11
1	141241	Fe-rich sheetwash	1	30	50	2.5	3450	5775	126914	264000	700	1000	1500	19010	-1000	16	8665	194.4	160	2790	92250	45.6	50.8	50	171.5	33.7	2.1	17.2	2	10	151.1	55.12	17.12	91.16	23.355	2.16	-0.05	-0.01	-0.02	0.1	0.2	0.12	5.3	1.5	-0.2	45	10.6	386.35	34.98
	Detection Limit				100	0.1	50	1	5	5000	200	1000	100	10	2000	0.5	20	0.5	1	2	20	0.2	0.5	0.5	0.5	0.05	0.05	0.5	1	10	0.05	0.05	0.05	0.1	0.05	0.05	0.05	0.005	0.01	0.02	0.1	0.02	0.1	0.2	0.5	2	0.05	0.2	0.05
2	141241	Fe-rich sheetwash	1	30	-100	2.4	3450	6441	115345	275000	600	-1000	1500	19970	-2000	17	9180	181.5	149	3234	84100	46.6	48.5	44.5	117.5	30.05	1.9	10	1	-10	126.35	52.5	16.8	217.1	22.55	2.3	-0.05	-0.005	-0.01	0.04	0.1	0.1	4.6	1	-0.5	42	9.1	369.8	46.2
2	141241	Fe-rich sheetwash	1	30	-100	2.5	3000	6672	118895	280000	800	1000	1600	20400	-2000	16.5	9080	190	146	4070	86560	46.6	47	44	125.5	31.35	1.95	10	1	-10	128.85	77.1	18.9	145.8	22.55	1.95	-0.05	-0.005	-0.01	0.04	0.2	0.1	4.7	1.2	-0.5	42	8.8	367.6	29.25
2	141241	Fe-rich sheetwash	1	30	-100	2.4	3450	5797	116345	280000	800	-1000	1600	20030	-2000	17.5	8000	176.5	180	2726	84380	51.6	48	45	121	30.4	1.85	10	1	10	126.6	51.8	19.75	97.4	20.45	2.05	-0.05	-0.005	-0.01	0.04	0.2	0.1	4.7	1	-0.5	38	8.65	334.4	34.8
	Detection Limit				50	0.05	10	1	2	2000	100	1000	100	10	1000	0.2	5	0.2	0.5	2	5	0.05	0.1	2	0.5	0.02	0.05	0.2	1	10	0.1	0.005	0.005	0.01	0.005	0.01	0.05	0.01	0.02	0.02	0.1	0.005	0.1	0.05	0.2	5	0.02	0.05	0.005
1	140839	Fe-rich sheetwash	10	60	100	1.95	520	2106	146876	256000	800	-1000	600	9260	-1000	23.8	9730	190.2	141	1112	105430	35.7	48.1	52	88.5	38	3	13.6	3	30	121.8	40.76	29.515	133.21	23.705	2.35	-0.05	-0.01	-0.02	0.1	-0.1	0.135	5.4	1.25	-0.2	115	9.6	219.9	42.16
1	140839	Fe-rich sheetwash	10	60	-50	2.05	630	1917	153274	240000	800	-1000	500	9260	-1000	25	10820	198.4	174	1124	104490	34	49.8	54	92.5	40.62	3	13.2	3	30	130.5	46.245	26.85	180.94	25.375	2.42	-0.05	-0.01	-0.02	0.08	-0.1	0.13	5.6	1.3	-0.2	100	9.72	220.3	44.385
1	140839	Fe-rich sheetwash	10	60	200	2.05	600	2230	153480	254000	800	-1000	400	9340	-1000	24.2	10425	196.6	138.5	1244	104470	33.35	49	52	90.5	40.2	3	13	3	30	128.8	39.815	26.38	186.65	23.715	2.48	-0.05	-0.01	-0.02	0.08	-0.1	0.13	5.4	1.2	-0.2	110	9.64	212.15	42.165
	Detection Limit				100	0.1	50	1	5	5000	200	1000	100	10	2000	0.5	20	0.5	1	2	20	0.2	0.5	0.5	0.5	0.05	0.05	0.5	1	10	0.05	0.05	0.05	0.1	0.05	0.05	0.05	0.005	0.01	0.02	0.1	0.02	0.1	0.2	0.5	2	0.05	0.2	0.05
2	140839	Fe-rich sheetwash	10	60	-100	2	500	2028	136655	265000	800	-1000	600	10310	-2000	27	11260	173	130	1218	89760	28.8	41.5	45.5	71	32.5	2.55	9.5	3	20	98.8	31.05	24.15	192.9	26.55	2.05	-0.05	-0.005	-0.01	0.06	-0.1	0.1	4.4	1	-0.5	80	7.15	201.6	34.4
2	140839	Fe-rich sheetwash	10	60	-100	2.1	500	2013	147315	255000	1000	-1000	600	9460	-2000	28	9980	177.5	138	848	95060	36.2	44.5	45.5	66	34.55	2.5	9.5	2	20	101.5	35.65	23.75	247	23.25	2	-0.05	-0.005	-0.01	0.04	-0.1	0.1	4.6	1	-0.5	76	7.55	195.6	40
2	140839	Fe-rich sheetwash	10	60	-100	1.9	400	2082	142710	270000	800	-1000	300	9330	-2000	25	8820	170.5	140	906	87200	27	40.5	43.5	64	32.85	2.45	8.5	2	20	101.45	31.5	23.65	142.6	22.5	2.15	-0.05	-0.005	-0.01	0.04	-0.1	0.1	4.4	1	-0.5	80	7.45	180.8	38.1
	Detection Limit				50	0.05	10	1	2	2000	100	1000	100	10	1000	0.2	5	0.2	0.5	2	5	0.05	0.1	2	0.5	0.02	0.05	0.2	1	10	0.1	0.005	0.005	0.01	0.005	0.01	0.05	0.01	0.02	0.02	0.1	0.005	0.1	0.05	0.2	5	0.02	0.05	0.005
1	140839	Fe-rich sheetwash	1	38	350	2	680	2224	126730	268000	800	-1000	400	8760	-1000	23	8685	179	152.5	1296	104600	41.1	46.8	50	79.5	35.92	2.75	13	3	30	106	30.725	21.22	84.26	22.26	2.32	-0.05	-0.01	-0.02	0.08	0.1	0.135	5.5	1.45	-0.2	95	8.54	204.1	38.97
1	140839	Fe-rich sheetwash	1	38	750	2.05	490	2333	135344	264000	800	-1000	400	9040	-1000	25.6	9760	189	653.5	1012	96605	30.9	51.7	52	90	37.3	2.9	13	3	30	118.2	37.76	26.575	203.34	20.905	2.42	-0.05	-0.01	-0.02	0.08	-0.1	0.14	6	1.3	-0.2	105	8.96	195.45	36.1
1	140839	Fe-rich sheetwash	1	38	-50	2.05	610	2398	127268	268000	700	-1000	300	8090	-1000	23	8530	175.4	165.5	1218	100725	27.85	45.5	50	89	35.5	2.75	12.6	3	30	111.7	36.655	25.82	141.55	22.905	2.04	-0.05	-0.01	-0.02	0.08	-0.1	0.115	5.4	1.9	-0.2	105	8.8	203.8	37.15
	Detection Limit				100	0.1	50	1	5	5000	200	1000	100	10	2000	0.5	20	0.5	1	2	20	0.2	0.5	0.5	0.5	0.05	0.05	0.5	1	10	0.05	0.05	0.05	0.1	0.05	0.05	0.05	0.005	0.01	0.02	0.1	0.02	0.1	0.2	0.5	2	0.05	0.2	0.05
2	140839	Fe-rich sheetwash	1	38	-100	2	500	1953	124120	275000	800	1000	500	9710	-2000	27	7740	164.5	182	1184	89560	34	44	43.5	72	31.6	2.35	9	3	20	94.4	30.5	23.75	99.3	21.3	2.3	-0.05	-0.005	-0.01	0.04	-0.1	0.12	4.8	0.8	-0.5	80	6.55	202.4	38.85
2	140839	Fe-rich sheetwash	1	38	-100	1.9	600	2390	135645	270000	800	-1000	400	10370	-2000	25.5	9100	158.5	167	1406	85660	39.2	42.5	43	59	32.95	2.55	9.5	3	20	92.6	31.3	23.75	89.9	20.2	2.05	-0.05	-0.005	-0.01	0.04	-0.1	0.1	4.6	1	-0.5	92	7.4	220.6	37.5
2	140839	Fe-rich sheetwash	1	38	-100	1.9	450	2171	127590	270000	800	-1000	300	10040	-2000	28	7360	186.5	292	1156	95380	43.4	44.5	47.5	63.5	34.55	2.65	9	3	20	99.25	34.2	25.15	386.1	23.45	2.05	-0.05	-0.005	-0.01	0.06	-0.1	0.1	5.5	1	-0.5	86	7.3	208.8	41.6
	Detection Limit				50	0.05	10	1	2	2000	100	1000	100	10	1000	0.2	5	0.2	0.5	2	5	0.05	0.1	2	0.5	0.02	0.05	0.2	1	10	0.1	0.005	0.005	0.01	0.005	0.01	0.05	0.01	0.02	0.02	0.1	0.005	0.1	0.05	0.2	5	0.02	0.05	0.005
1	141744	Fe-rich soil	4	20	800	2.4	420	1882	161090	232000	700	1000	200	9400	1000	40	9675	281.8	197.5	662	109965	15.9	63.2	66	113.5	47.32	2.7	14.6	2	20	122.2	46.755	47.745	191.8	25.435	2.81	0.05	0.01	0.02	0.08	0.1	0.15	5.6	1.15	0.2	45	9.8	196.5	40.345
1	141744	Fe-rich soil	4	20	50	2.45	600	1809	160636	234000	700	1000	200	8930	1000	39.8	11325	294.2	205.5	458	115520	14.8	64.3	70	113.5	48.44	2.7	13.8	4	20	127.5	51.73	26.615	202.54	27.575	2.95	0.05	0.01	0.02	0.08	0.1	0.145	5.9	1.25	0.2	45	10.1	212.35	42.305
1	141744	Fe-rich soil	4	20	50	2.2	420	1740	168828	230000	700	1000	200	7870	1000	36.8	9690	260	196.5	464	101615	16.1	59.7	66	103	43.04	2.4	11	3	20	111	46.345	27.32	192.59	22.41	2.71	0.05	0.01	0.02	0.6	0.1	0.14	5.1	1.25	0.2	35	9.4	198.05	65.37
	Detection Limit				100	0.1	50	1	5	5000	200	1000	100	10	2000	0.5	20	0.5	1	2	20	0.2	0.5	0.5	0.5	0.05	0.05	0.5	1	10	0.05	0.05	0.05	0.1	0.05	0.05	0.05	0.005	0.01	0.02	0.1	0.02	0.1	0.2	0.5	2	0.05	0.2	0.05
2	141744	Fe-rich soil	4	20	100	1.9	300	1785	164985	260000	800	1000	200	6510	2000	29	8640	213	158	342	82580	11.6	46.5	55.5	76.5	36.05	1.95	8.5	2	10	79.5	34	17.75	132.3	20.3	3.35	0.05	0.005	0.01	0.04	0.1	0.1	4.1	0.8	0.5	32	6.45	155.4	33.8
2	141744	Fe-rich soil	4	20	100	1.9	550	1988	168045	245000	800	1000	200	6210	2000	34	8200	223.5	190	692	87800	12	50	53	76.5	36.05	1.9	8	2	10	79.4	38.15	21.05	303.3	21.35	2.25	0.05	0.005	0.01	0.04	0.1	0.1	4.2	0.8	0.5	34	6.6	155.6	37.05
2	141744	Fe-rich soil	4	20	100	1.9	300	1550	168770	245000	800	1000	300	6050	2000	34.5	8200	214	186	398	86880	12	48	52.5	84.5	36.4	1.9	8.5	2	10	80.4	37.5	18.9	127	22.2	2	0.05	0.005	0.01	0.1	0.1	0.1	4.5	0.8	0.5	30	7.15	166.2	38.2
	Detection Limit				50	0.05	10	1	2	2000	100	1000	100	10	1000	0.2	5	0.2	0.5	2	5	0.05	0.1	2	0.5	0.02	0.05	0.2	1	10	0.1	0.005	0.005	0.01	0.005	0.01	0.05	0.01	0.02	0.02	0.1	0.005	0.1	0.05	0.2	5	0.02	0.05	0.005
1	141744	Fe-rich soil	4	30	50	2.15	460	1971	157510	232000	700	1000	200	9220	1000	31.6	9720	270	204.5	402	107550	14.95	62.3	66	116	47.64	2.65	12.6	2	20	116	41.865	46.08	189.67	26.22	2.65	0.05	0.01	0.02	0.08	0.1	0.14	5.2	1.2	0.2	50	9.82	188.1	39.025
1	141744	Fe-rich soil	4	30	50	2.2	430	1857	158120	232000	700	1000	200	8720	1000	36.4	10070	265	193.5	406	104525	16.5	61.2	66	106	46.42	2.55	13	3	20	113.4	49.895	60.905	247.18	24.635	2.6	0.05	0.01	0.02	0.08	0.1	0.14	5.3	1.15	0.2	40	9.7	187.3	43.935
1	141744	Fe-rich soil	4	30	50	2.2	480	1916	161658	232000	700	1000	200	8480	1000	36.8	9860	274.6	214	420	111630	15.75	61.7	66	111.5	45.4	2.6	12.4	2	20	116.8	47.075	25.585	256.88	25.64	2.51	0.05	0.01	0.02	0.08	0.1	0.135	5.2	1.2	0.2	45	9.74	193.65	49.385
	Detection Limit				100	0.1	50	1	5	5000	200	1000	100	10	2000	0.5	20	0.5	1	2	20	0.2	0.5	0.5	0.5	0.05	0.05	0.5	1	10	0.05	0.05	0.05	0.1	0.05	0.05	0.05	0.005	0.01	0.02	0.1	0.02	0.1	0.2	0.5	2	0.05	0.2	0.05
2	141744	Fe-rich soil	4	30	100	1.9	400	1688	170620	255000	800	1000	200	7010	2000	34.5	8700	221	162	360	84660	14.4	49.5	54.5	78	36.65	1.9	8.5	1	10	82.2	36.35	20.6	160.1	20.45	2.2	0.05	0.005	0.01	0.04	0.1	0.1	4.2	0.8	0.5	36	6.85	156.8	37.45
2	141744	Fe-rich soil	4	30	100	2	300	1628	173595	235000	800	1000	200	6320	2000	31.5	8460	225.5	252	326	86260	12	50	53.5	78	35.85	1.9	8.5	2	10	85.7	35.9	25.5	197.1	21.25	2.15	0.05	0.005	0.01	0.04	0.1	0.1	4.2	0.8	0.5	30	6.85	158.2	38.4
2	141744	Fe-rich soil	4	30	100	1.9	300	1730	165345	250000	800	1000	200	7100	2000	34	8460	230.5	211	356	89320	13.6	50.5	55	83	37.35	1.95	8.5	2	10	81.7	42.35	19.7	161.9	22.6	2.05	0.05	0.005	0.01	0.04	0.1	0.1	4.2	0.8	0.5	32	6.75	171.8	41.3
	Detection Limit				50	0.05	10	1	2	2000	100	1000	100	10	1000	0.2	5	0.2	0.5	2	5	0.05	0.1	2	0.5	0.02	0.05	0.2	1	10	0.1	0.005	0.005	0.01	0.005	0.01	0.05	0.01	0.02	0.02	0.1	0.005	0.1	0.05	0.2	5	0.02	0.05	0.005
1	141744	Fe-rich soil	4	40	50	2.3	440	2053	164840	234000	700	1000	300	8750	1000	30.2	9895	273.6	217.5	426	104900	14.4	59.3	66	111	45.76	2.65	12.8	3	20	119	40.47	35.255	148.58	24.92	4.13	0.05	0.01	0.02	0.06	0.1	0.145	5.3	1.05	0.2	50	9.62	179.6	41.02
1	141744	Fe-rich soil	4	40	200	2.45	570	1956	167524	234000	700	1000	200	9020	1000	38	11075	291.6	208	460	111240	16.75	65.1	70	113.5	47.42	2.65	12.8	3	20	122.8	45.48	24.93	175.17	25.885	2.82	0.05	0.01	0.02	0.08	0.1	0.14	5.6	1.15	0.2	50	10.08	193.75	42.23
1	141744	Fe-rich soil	4	40	150	2.1	480	1911	153450	226000	700	1000	200	8940	1000	30.4	10330	280.8	271	474	106355	15.95	62	70	112	48.22	2.65	12.8	2	20	124.6	47.655	23.96	145.06	25.095	2.77	0.05	0.01	0.02	0.08	0.1	0.145	5.7	1.1	0.2	55	10.06	184.2	38.77
	Detection Limit				100	0.1	50	1	5	5000	200	1000	100	10	2000	0.5	20	0.5	1	2	20	0.2	0.5	0.5	0.5	0.05	0.05	0.5	1	10	0.05	0.05	0.05	0.1	0.05	0.05	0.05	0.005	0.01	0.02	0.1	0.02	0.1	0.2	0.5	2	0.05	0.2	0.05
2	141744	Fe-rich soil	4	40	100	1.8	350	1893	164205	250000	800	1000	300	6460	2000	30	8360	216.5	197	322	83120	13.4	49	51	75	36.3	1.9	8	2	10	82.45	34.75	21.45	178.5	19.45	2	0.05	0.005	0.01	0.04	0.1	0.1	4.2	0.8	0.5	36	6.75	150.8	36.75
2	141744	Fe-rich soil	4	40	100	1.9	400	1808	174485	250000	800	1000	300	6700	2000	32	8620	223.5	180	358	87760	13	52.5	54.5	78.5	38	1.95	8.5	2	10	83.3	35.95	22.45	117.5	20.65	2.15	0.05	0.005	0.01	0.04	0.1	0.1	4.3	0.8	0.5	34	7.1	164.4	37.05
2	141744	Fe-rich soil	4	40	100	1.8	300	1635	157990	250000	800	1000	200	6590	2000	29	8800	226	175	386	84140	12.6	50.5	55	80	37.3	1.9	7.5	1	10	78.35	31.95	17.25	150.7	18.7	2.05	0.05	0.005	0.01	0.04	0.1	0.1	3.9	0.6	0.5	36	6.7	146	30.35
	Detection Limit				50	0.05	10	1	2	2000	100	1000	100	10	1000	0.2	5	0.2	0.5	2	5	0.05	0.1	2	0.5	0.02	0.05	0.2	1	10	0.1	0.005	0.005	0.01	0.005	0.01	0.05	0.01	0.02	0.02	0.1	0.005	0.1	0.05	0.2	5	0.02	0.05	0.005
1	Filter paper				-50	-0.05	60	34	74	-2000	-100	-1000	200	20	2000	0.4	-5	-0.2	83	-2	200	0.1	1.5	2	54	0.02	-0.05	-0.2	-1	-10	-0.1	1.39	0.025	5.84	0.03	0.09	-0.05	-0.01	-0.02	0.06	0.4	-0.005	0.2	-0.05	-0.2	-5	-0.02	0.4	0.04
1	Filter paper				-50	-0.05	20	15	20	-2000	-100	-1000	-100	20	1000	0.4	-5	-0.2	513	-2	160	-0.05	1.4	-2	8	-0.02	-0.05	-0.2	-1	-10	-0.1	0.975	-0.005	0.03	0.03	0.02	-0.05	-0.01	-0.02	-0.02	-0.1	0.03	0.1	0.1	-0.2	-5	-0.02	0.7	0.005
1	Filter paper				-50	-0.05	10	14	76	-2000	-100	-1000	-100	30	1000	0.4	-5	-0.2	35.5	-2	45	0.05	1.2	-2	13.5	-0.02	-0.05	-0.2	-1	-10	-0.1	0.91	-0.005	0.03	0.025	0.03	-0.05	-0.01	-0.02	-0.02	-0.1	-0.005	-0.1	0.05	-0.2	-5	-0.02	0.3	0.01
	Detection Limit				100	0.1	50	1	5	5000	200	1000	100	10	2000	0.5	20	0.5	1	2	20	0.2	0.5	0.5	0.5	0.05	0.05	0.5	1	10	0.05	0.05	0.05	0.1	0.05	0.05	0.05	0.005	0.01	0.02	0.1	0.02	0.1	0.2	0.5	2	0.05	0.2	0.05
2	Filter paper				-100	-0.1	-50	21	1335	-5000	-200	-1000	-100	20	-2000	0.5	-20	-0.5	98	2	60	-0.2	1.5	1	4	-0.05	-0.05	-0.5	-1	-10	0.55	0.75	-0.05	0.2	0.05	-0.05	-0.05	-0.005	-0.01	-0.02	-0.1	-0.02	-0.1	-0.2	-0.5	-2	-0.05	0.8	-0.05
2	Filter paper				-100	-0.1	-50	22	40	-5000	-200	-1000	-100	40	-2000	0.5	-20	-0.5	30	-2	180	-0.2	1.5	2	1.5	0.05	-0.05	-0.5	-1	-10	0.15	0.55	-0.05	0.4	0.1	-0.05	-0.05	-0.005	-0.01	-0.02	-0.1	-0.02	0.8	-0.2	-0.5	-2	-0.05	0.6	-0.05
2	Filter paper				-100	-0.1	-50	22	40	-5000	-200	-1000	-100	10	-2000	-0.5	-20	-0.5	52	-2	-20	-0.2	1.5	-0.5	19	-0.05	-0.05	-0.5	-1	-10	-0.05	0.55	-0.05	0.2	-0.05	-0.05	-0.05	-0.005	-0.01	-0.02	-0.1	-0.02	0.1	0.2	-0.5	-2	-0.05	0.8	-0.05
	Detection Limit				50	0.05	10	1	2	2000	100	1000	100	10	1000	0.2	5	0.2	0.5	2	5	0.05	0.1	2	0.5	0.02	0.05	0.2	1	10	0.1	0.005	0.005	0.01	0.005	0.01	0.05	0.01	0.02	0.02	0.1	0.005	0.1	0.05	0.2	5	0.02	0.05	0.005
1	141835	Si-rich sheetwash	2.5	30	-50	3.25	670	3157	142232	250000	1000	-1000	300	12930	2000	27	9385	249.2	250.5	1132	102585	32.25	63.7	60	128.5	41.7	2.75	17.4	3	30	159	87.08	70.22	157.38	27.655	2.82	-0.05	-0.01	-0.02	0.12	0.1	0.135	6	1.55	-0.2	65	10.62	336.35	55.125
1	141835	Si-rich sheetwash	2.5	30	-50	3.4	590	3236	143936	236000	1100	-1000	300	14880	2000	27.6	9880	248.2	216.5	1264	109420	31.85	65.6	60	128	42.04	2.7	15.4	4	30	163.9	87.465	39.09	270.6	27.885	2.94	-0.05	-0.01	-0.02	0.12	0.2	0.15	6.1	1.45	-0.2	65	11.08	348.4	68.8
1	141835	Si-rich sheetwash	2.5	30	-50	3.2	690	2969	141868	246000	1100	-1000	200	13780	2000	28.8	10240	245.2	196	1614	105130	34.05	65.5	64	126	44.3	2.8	17.4	3	30	162.3	93.145	36.4	213.05	26.575	2.91	-0.05	-0.01	-0.02	0.12	0.1	0.145	6.1	1.5	-0.2	85	10.88	344.25	57.445
	Detection Limit				100	0.1	50	1	5	5000	200	1000	100	10	2000	0.5	20	0.5	1	2	20	0.2	0.5	0.5	0.5	0.05	0.05	0.5	1	10	0.05	0.05	0.05	0.1	0.05	0.05	0.05	0.005	0.01	0.02	0.1	0.02	0.1	0.2	0.5	2	0.05	0.2	0.05
2	141835	Si-rich sheetwash	2.5	30	-100	2.6	500	3008	147960	255000	1200	-1000	400	10800	-2000	27	8720	214	269	1306	91860	28	55.5	54.5	96.5	35.5	2.15	11	2	20	118.45	72.7	30.55	199.1	24.25	2.35	-0.05	-0.005	-0.01	0.06	0.1	0.1	4.8	1	-0.5	48	7.85	290.2	46.2
2	141835	Si-rich sheetwash	2.5	30	-100	2.5	400	2666	147480	250000	1200	-1000	300	11290	-2000	27.5	9120	211	174	1242	92260	28.4	53.5	52	96.5	35.8	2.1	11	2	20	112.75	78.2	30.7	166	24.95	2.2	-0.05	-0.005	-0.01	0.06	0.1	0.1	4.7	1	-0.5	42	8.05	313.2	52.75
2	141835	Si-rich sheetwash	2.5	30	-100	2.7	450	2699	153905	255000	1200	-1000	300	10940	-2000	26	9000	198	160	1228	87300	27.6	52	50	92.5	34.35	2	11	2	20	107	64.75	27.7	194.7	22.75	2.1	-0.05	-0.005	-0.01	0.06	0.1	0.1	4.7	1.2	-0.5	44	7.9	302	53.5
	Detection Limit				50	0.05	10	1	2	2000	100	1000	100	10	1000	0.2	5	0.2	0.5	2	5	0.05	0.1	2	0.5	0.02	0.05	0.2	1	10	0.1	0.005	0.005	0.01	0.005	0.01	0.05	0.01	0.02	0.02	0.1	0.005	0.1	0.05	0.2	5	0.02	0.05	0.005
1	Filter paper				-50	-0.05	60	34	74	-2000	-100	-1000	200	20	2000	0.4	-5	-0.2	83	-2	200	0.1	1.5	2	54	0.02	-0.05	-0.2	-1	-10	-0.1	1.39	0.025	5.84	0.03	0.09	-0.05	-0.01	-0.02	0.06	0.4	-0.005	0.2	-0.05	-0.2	-5	-0.02	0.4	0.04
1	Filter paper				-50	-0.05	20	15	20	-2000	-100	-1000	-100	20	1000	0.4	-5	-0.2	513	-2	160	-0.05	1.4	-2	8	-0.02	-0.05	-0.2	-1	-10	-0.1	0.975	-0.005	0.03	0.03	0.02	-0.05	-0.01	-0.02	-0.02	-0.1	0.03	0.1	0.1	-0.2	-5	-0.02	0.7	0.005
1	Filter paper				-50	-0.05	10	14	76	-2000	-100	-1000	-100	30	1000	0.4	-5	-0.2	35.5	-2	45	0.05	1.2	-2	13.5	-0.02	-0.05	-0.2	-1	-10	-0.1	0.91	-0.005	0.03	0.025	0.03	-0.05	-0.01	-0.02	-0.02	-0.1	-0.005	-0.1	0.05	-0.2	-5	-0.02	0.3	0.01
	Detection Limit				100	0.1	50	1	5	5000	200	1000	100	10	2000	0.5	20	0.5	1	2	20	0.2	0.5	0.5	0.5	0.05	0.05	0.5	1	10	0.05	0.05	0.05	0.1	0.05	0.05	0.05	0.005	0.01	0.02	0.1	0.02	0.1	0.2	0.5	2	0.05	0.2	0.05
2	Filter paper				-100	-0.1	-50	21	1335	-5000	-200	-1000	-100	20	-2000	0.5	-20	-0.5	98	2	60	-0.2	1.5	1	4	-0.05	-0.05	-0.5	-1	-10	0.55	0.75	-0.05	0.2	0.05	-0.05	-0.05	-0.005	-0.01	-0.02	-0.1	-0.02	-0.1	-0.2	-0.5	-2	-0.05	0.8	-0.05
2	Filter paper				-100	-0.1	-50	22	40	-5000	-200	-1000	-100	40	-2000	0.5	-20	-0.5	30	-2	180	-0.2	1.5	2	1.5	0.05	-0.05	-0.5	-1	-10	0.15	0.55	-0.05	0.4	0.1	-0.05	-0.05	-0.005	-0.01	-0.02	-0.1	-0.02	0.8	-0.2	-0.5	-2	-0.05	0.6	-0.05
2	Filter paper				-100	-0.1	-50	22	40	-5000	-200	-1000	-100	10	-2000	-0.5	-20	-0.5	52	-2	-20	-0.2	1.5	-0.5	19	-0.05	-0.05	-0.5	-1	-10	-0.05	0.55	-0.05	0.2	-0.05	-0.05	-0.05	-0.005	-0.01	-0.02	-0.1	-0.02	0.1	0.2	-0.5	-2	-0.05	0.8	-0.05
	Detection Limit				50	0.05	10	1	2	2000	100	1000	100	10	1000	0.2	5	0.2	0.5	2	5	0.05	0.1	2	0.5	0.02	0.05	0.2	1	10	0.1	0.005	0.005	0.01	0.005	0.01	0.05	0.01	0.02	0.02	0.1	0.005	0.1	0.05	0.2	5	0.02	0.05	0.005
1	141835	Si-rich sheetwash	1	20	200	2.55	540	2517	112158	294000	1000	-1000	300	13330	3000	20.4	8365	189	182.5	1180	83655	28.35	52.6	48	97	34.4	2.35	13	3	30	123.4	76.74	25.92	83.73	19.105	2.14	-0.05	-0.01	-0.02	0.12	0.2	0.11	5.3	1.1	-0.2	50	8.16	270.05	56.68
1	141835	Si-rich sheetwash	1	20	500	2.35	1630	2752	103820	302000	1100	-1000	300	11570	3000	19.2	7375	188.8	340	982	81840	28.2	47.5	46	100	31.92	2.2	11.4	2	20	125.5	55.125	29.295	92.2	16.585	2.13	-0.05	-0.01	-0.02	0.12	0.1	0.1	5.5	1.35	-0.2	55	7.96	276.45	38.76
1	141835	Si-rich sheetwash	1	20	250	2.7	480	2922	121128	280000	1100	-1000	400	13220	3000	22.4	7410	199	230.5	1174	82555	28.1	52.5	54	95	32.7	2.15	12.8	3	20	132.7	71.255	32.535	263.27	19.345	2.3	-0.05	-0.01	-0.02	0.1	0.2	0.11	5.9	1.2	-0.2	60	9.08	345.1	54.82
	Detection Limit				100	0.1	50	1	5	5000	200	1000	100	10	2000	0.5	20	0.5	1	2	20	0.2	0.5	0.5	0.5	0.05	0.05	0.5	1	10	0.05	0.05	0.05	0.1	0.05	0.05	0.05	0.005	0.01	0.02	0.1	0.02	0.1	0.2	0.5	2	0.05	0.2	0.05
2	141835	Si-rich sheetwash	1	20	-100	2.6	850	2659	118085	290000	1200	-1000	400	10080	2000	20	7000	178	144	1160	78720	30.4	48	44.5	77	28.7	1.95	9.5	2	20	100.45	58.95	26.2	89.8	18.7	1.95	-0.05	-0.005	-0.01	0.06	0.2	0.1	4.9	1	-0.5	38	6.45	272.6	45.3
2	141835	Si-rich sheetwash	1	20	-100	2.7	400	2767	130040	275000	1200	-1000	400	10360	2000	24.5	9180	184.5	181	1322	80500	32.8	46	45	90.5	30.65	2.05	10	2	20	112	64.35	29.4	113.6	18.45	2.2	-0.05	-0.005	-0.01	0.1	0.2	0.1	5.6	1	-0.5	36	6.6	284.4	38
2	141835	Si-rich sheetwash	1	20	-100	2.5	850	2783	125555	290000	1000	-1000	400	10560	2000	24.5	6540	157.5	402	1244	67180	31.6	42.5	43	102.5	28	1.8	10	3	20	100.05	60.55	27.3	100.5	19.55	1.85	-0.05	-0.005	-0.01	0.08	0.2	0.1	5.4	0.8	-0.5	36	6.65	296.2	47.15
	Detection Limit				50	0.05	10	1	2	2000	100	1000	100	10	1000	0.2	5	0.2	0.5	2	5	0.05	0.1	2	0.5	0.02	0.05	0.2	1	10	0.1	0.005	0.005	0.01	0.005	0.01	0.05	0.01	0.02	0.02	0.1	0.005	0.1	0.05	0.2	5	0.02	0.05	0.005
1	141105	Ca-rich lacustrine	2.5	30	-50	1.8	13840	36929	80058	192000	600	74000	7400	30640	71000	11.2	4170	104.6	229.5	262	44885	11.5	29.2	38	76.5	19.9	1.3	5.4	-1	40	104.7	307.57	10.525	62.89	11.38	1.17	-0.05	-0.01	-0.02	0.04	-0.1	0.075	3.5	0.7	-0.2	20	7.56	235.15	30.74
1	141105	Ca-rich lacustrine	2.5	30	100	1.95	10160	36282	86164	186000	600	72000	7600	32030	69000	14.6	3855	109.4	170.5	334	47310	12.85	32.8	46	82.5	21.3	1.6	6	2	30	116.5	346.4	14.215	136	12.71	1.34	-0.05	-0.01	-0.02	0.04	-0.1	0.065	3.7	0.8	-0.2	30	9.5	263.15	26.185
1	141105	Ca-rich lacustrine	2.5	30	300	2.05	10020	39077	81578	188000	600	73000	7600	34340	61000	13.6	3845	119	293	290	48710	11.75	33.4	38	82	20.96	1.45	6.6	1	40	113.9	314.99	18.07	136.47	11.97	1.22	-0.05	-0.01	-0.02	0.06	-0.1	0.06	3.4	0.75	-0.2	25	8.52	232.9	28.36
	Detection Limit				100	0.1	50	1	5	5000	200	1000	100	10	2000	0.5	20	0.5	1	2	20	0.2	0.5	0.5	0.5	0.05	0.05	0.5	1	10	0.05	0.05	0.05	0.1	0.05	0.05	0.05	0.005	0.01	0.02	0.1	0.02	0.1	0.2	0.5	2	0.05	0.2	0.05
2	141105	Ca-rich lacustrine	2.5	30	-100	1.7	14150	35139	79210	195000	600	83000	10400	26340	52000	10.5	3660	96.5	165	234	42500	9.2	27	35.5	62	17.85	1.2	4.5	1	30	81.95	301.8	10.45	61.7	10.5	1	-0.05	-0.005	-0.01	-0.02	-0.1	0.04	2.6	0.4	-0.5	18	5.75	222.6	28.85
2	141105	Ca-rich lacustrine	2.5	30	-100	1.7	15150	36632	90045	185000	600	86000	9200	28140	42000	13	3620	104	172	348	44040	10.8	31.5	38.5	64.5	18.45	1.35	5.5	1	30	98.65	304.1	10.8	111.2	11.3	1.1	-0.05	-0.005	-0.01	-0.02	-0.1	0.04	3	0.6	-0.5	26	5.75	230.2	22.4
2	141105	Ca-rich lacustrine	2.5	30	-100	2	21300	39918	94860	170000	600	88000	8800	29800	50000	15	3980	107.5	236	272	46700	11.2	30.5	43	67	19.25	1.5	5	2	30	98.75	317	16.45	83.3	11.9	1.15	-0.05	-0.005	-0.01	-0.02	-0.1	0.04	3.1	0.6	-0.5	22	6.5	230	27.85
	Detection Limit				50	0.05	10	1	2	2000	100	1000	100	10	1000	0.2	5	0.2	0.5	2	5	0.05	0.1	2	0.5	0.02	0.05	0.2	1	10	0.1	0.005	0.005	0.01	0.005	0.01	0.05	0.01	0.02	0.02	0.1	0.005	0.1	0.05	0.2	5	0.02	0.05	0.005
1	Filter paper				-50	-0.05	60	34	74	-2000	-100	-1000	200	20	2000	0.4	-5	-0.2	83	-2	200	0.1	1.5	2	54	0.02	-0.05	-0.2	-1	-10	-0.1	1.39	0.025	5.84	0.03	0.09	-0.05	-0.01	-0.02	0.06	0.4	-0.005	0.2	-0.05	-0.2	-5	-0.02	0.4	0.04
1	Filter paper				-50	-0.05	20	15	20	-2000	-100	-1000	-100	20	1000	0.4	-5	-0.2	513	-2	160	-0.05	1.4	-2	8	-0.02	-0.05	-0.2	-1	-10	-0.1	0.975	-0.005	0.03	0.03	0.02	-0.05	-0.01	-0.02	-0.02	-0.1	0.03	0.1	0.1	-0.2	-5	-0.02	0.7	0.005
1	Filter paper				-50	-0.05	10	14	76	-2000	-100	-1000	-100	30	1000	0.4	-5	-0.2	35.5	-2	45	0.05	1.2	-2	13.5	-0.02	-0.05	-0.2	-1	-10	-0.1	0.91	-0.005	0.03	0.025	0.03	-0.05	-0.01	-0.02	-0.02	-0.1	-0.005	-0.1	0.05	-0.2	-5	-0.02	0.3	0.01
	Detection Limit				100	0.1	50	1	5	5000	200	1000	100	10	2000	0.5	20	0.5	1	2	20	0.2	0.5	0.5	0.5	0.05	0.05	0.5	1	10	0.05	0.05	0.05	0.1	0.05	0.05	0.05	0.005	0.01	0.02	0.1	0.02	0.1	0.2	0.5	2	0.05	0.2	0.05
2	Filter paper				-100	-0.1	-50	21	1335	-5000	-200	-1000	-100	20	-2000	0.5	-20	-0.5	98	2	60	-0.2	1.5	1	4	-0.05	-0.05	-0.5	-1	-10	0.55	0.75	-0.05	0.2	0.05	-0.05	-0.05	-0.005	-0.01	-0.02	-0.1	-0.02	-0.1	-0.2	-0.5	-2	-0.05	0.8	-0.05
2	Filter paper				-100	-0.1	-50	22	40	-5000	-200	-1000	-100	40	-2000	0.5	-20	-0.5	30	-2	180	-0.2	1.5	2	1.5	0.05	-0.05	-0.5	-1	-10	0.15	0.55	-0.05	0.4	0.1	-0.05	-0.05	-0.005	-0.01	-0.02	-0.1	-0.02	0.8	-0.2	-0.5	-2	-0.05	0.6	-0.05
2	Filter paper				-100	-0.1	-50	22	40	-5000	-200	-1000	-100	10	-2000	-0.5	-20	-0.5	52	-2	-20	-0.2	1.5	-0.5	19	-0.05	-0.05	-0.5	-1	-10	-0.05	0.55	-0.05	0.2	-0.05	-0.05	-0.05	-0.005	-0.01	-0.02	-0.1	-0.02	0.1	0.2	-0.5	-2	-0.05	0.8	-0.05
	Detection Limit				50	0.05	10	1	2	2000	100	1000	100	10	1000	0.2	5	0.2	0.5	2	5	0.05	0.1	2	0.5	0.02	0.05	0.2	1	10	0.1	0.005	0.005	0.01	0.005	0.01	0.05	0.01	0.02	0.02	0.1	0.005	0.1	0.05	0.2	5	0.02	0.05	0.005
1	141583	Si-rich eolian sand	2.5	30	100	2.3	540	2139	121542	270000	500	2000	600	11240	1000	30	9630	222.4	686	3216	92245	75.65	49.4	46	62.5	35.58	2.4	13.4	3	30	123.3	39.89	30.63	253.72	24.495	2.39	-0.05	-0.01	-0.02	0.1	0.1	0.135	5.7	1.45	-0.2	90	8.84	222	47.36
1	141583	Si-rich eolian sand	2.5	30	-50	2.6	560	1970	132992	262000	600	1000	600	11390	1000	36.8	9490	227.8	175	3596	95445	76.85	54.5	48	64	37.24	2.45	13	3	20	125.8	40.205	33.96	152	22.14	2.55	-0.05	-0.01	-0.02	0.1	0.1	0.135	5.6	1.25	-0.2	85	9.26	208.25	47.03
1	141583	Si-rich eolian sand	2.5	30	-50	2.55	1040	2116	131366	270000	600	2000	600	11680	1000	32.2	8595	226.2	171.5	3110	92100	60.6	50.5	48	65	36.66	2.5	15.2	3	20	122.9	37.805	32.275	230.35	21.825	2.5	-0.05	-0.01	-0.02	0.1	-0.1	0.14	5.4	1.2	-0.2	100	9.5	218.1	51.545
	Detection Limit				100	0.1	50	1	5	5000	200	1000	100	10	2000	0.5	20	0.5	1	2	20	0.2	0.5	0.5	0.5	0.05	0.05	0.5	1	10	0.05	0.05	0.05	0.1	0.05	0.05	0.05	0.005	0.01	0.02	0.1	0.02	0.1	0.2	0.5	2	0.05	0.2	0.05
2	141583	Si-rich eolian sand	2.5	30	-100	2.4	500	1974	152840	255000	600	1000	700	9620	-2000	32.5	10320	211	235	3748	88680	87.4	48.5	47	64.5	33.2	2.25	10.5	3	20	104.4	35.8	32.7	159.8	23.4	2.6	-0.05	-0.005	-0.01	0.08	0.1	0.12	5.7	1	-0.5	68	7.5	225	46.75
2	141583	Si-rich eolian sand	2.5	30	-100	2.3	950	2069	152540	255000	600	1000	700	9740	-2000	34.5	8940	199	162	4072	89700	76.2	47	47	52	33.75	2.15	10	3	20	107.3	40.3	45.05	142.8	22.3	2.5	-0.05	-0.005	-0.01	0.06	-0.1	0.12	5.6	1	-0.5	66	7.2	207.4	45.3
2	141583	Si-rich eolian sand	2.5	30	-100	2.4	650	1866	146440	255000	600	1000	600	9710	-2000	32	8460	198	709	2706	85240	64.4	45	43.5	56	31.05	2	10.5	2	20	98	38.25	24.15	140.5	20.95	2.3	-0.05	-0.005	-0.01	0.06	-0.1	0.1	6.4	1	-0.5	64	7.15	193.2	47
	Detection Limit				50	0.05	10	1	2	2000	100	1000	100	10	1000	0.2	5	0.2	0.5	2	5	0.05	0.1	2	0.5	0.02	0.05	0.2	1	10	0.1	0.005	0.005	0.01	0.005	0.01	0.05	0.01	0.02	0.02	0.1	0.005	0.1	0.05	0.2	5	0.02	0.05	0.005
1	Filter paper				-50	-0.05	60	34	74	-2000	-100	-1000	200	20	2000	0.4	-5	-0.2	83	-2	200	0.1	1.5	2	54	0.02	-0.05	-0.2	-1	-10	-0.1	1.39	0.025	5.84	0.03	0.09	-0.05	-0.01	-0.02	0.06	0.4	-0.005	0.2	-0.05	-0.2	-5	-0.02	0.4	0.04
1	Filter paper				-50	-0.05	20	15	20	-2000	-100	-1000	-100	20	1000	0.4	-5	-0.2	513	-2	160	-0.05	1.4	-2	8	-0.02	-0.05	-0.2	-1	-10	-0.1	0.975	-0.005	0.03	0.03	0.02	-0.05	-0.01	-0.02	-0.02	-0.1	0.03	0.1	0.1	-0.2	-5	-0.02	0.7	0.005
1	Filter paper				-50	-0.05	10	14	76	-2000	-100	-1000	-100	30	1000	0.4	-5	-0.2	35.5	-2	45	0.05	1.2	-2	13.5	-0.02	-0.05	-0.2	-1	-10	-0.1	0.91	-0.005	0.03	0.025	0.03	-0.05	-0.01	-0.02	-0.02	-0.1	-0.005	-0.1	0.05	-0.2	-5	-0.02	0.3	0.01
	Detection Limit				100	0.1	50	1	5	5000	200	1000	100	10	2000	0.5	20	0.5	1	2	20	0.2	0.5	0.5	0.5	0.05	0.05	0.5	1	10	0.05	0.05	0.05	0.1	0.05	0.05	0.05	0.005	0.01	0.02	0.1	0.02	0.1	0.2	0.5	2	0.05	0.2	0.05
2	Filter paper				-100	-0.1	-50	21	1335	-5000	-200	-1000	-100	20	-2000	0.5	-20	-0.5	98	2	60	-0.2	1.5	1	4	-0.05	-0.05	-0.5	-1	-10	0.55	0.75	-0.05	0.2	0.05	-0.05	-0.05	-0.005	-0.01	-0.02	-0.1	-0.02	-0.1	-0.2	-0.5	-2	-0.05	0.8	-0.05
2	Filter paper				-100	-0.1	-50	22	40	-5000	-200	-1000	-100	40	-2000	0.5	-20	-0.5	30	-2	180	-0.2	1.5	2	1.5	0.05	-0.05	-0.5	-1	-10	0.15	0.55	-0.05	0.4	0.1	-0.05	-0.05	-0.005	-0.01	-0.02	-0.1	-0.02	0.8	-0.2	-0.5	-2	-0.05	0.6	-0.05
2	Filter paper				-100	-0.1	-50	22	40	-5000	-200	-1000	-100	10	-2000	-0.5	-20	-0.5	52	-2	-20	-0.2	1.5	-0.5	19	-0.05	-0.05	-0.5	-1	-10	-0.05	0.55	-0.05	0.2	-0.05	-0.05	-0.05	-0.005	-0.01	-0.02	-0.1	-0.02	0.1	0.2	-0.5	-2	-0.05	0.8	-0.05
	Detection Limit				50	0.05	10	1	2	2000	100	1000	100	10	1000	0.2	5	0.2	0.5	2	5	0.05	0.1	2	0.5	0.02	0.05	0.2	1	10	0.1	0.005	0.005	0.01	0.005	0.01	0.05	0.01	0.02	0.02	0.1	0.005	0.1	0.05	0.2	5	0.02	0.05	0.005
1	141415	Ca-rich eolian sand	10	30	350	1.05	12530	129513	45618	238000	300	27000	6600	8660	47000	8	2965	169.6	82.5	498	39160	11.25	24	28	67	14.74	1.15	9.8	2	180	50.7	982.07	8.07	45.51	6.665	3.19	-0.05	-0.01	-0.02	-0.02	-0.1	0.045	1.8	0.5	-0.2	705	4.22	81.6	13.79
1	141415	Ca-rich eolian sand	10	30	250	1	15310	127803	43716	218000	300	30000	6100	8340	57000	10.2	2625	152.8	82	348	32690	10.8	21.8	24	62.5	13.04	1.05	8.4	2	160	45.3	934.635	22.085	43.55	5.425	3.01	-0.05	-0.01	-0.02	-0.02	-0.1	0.045	1.9	0.5	-0.2	660	3.92	73.4	12.605
1	141415	Ca-rich eolian sand	10	30	150	1.05	13830	123334	49480	234000	300	28000	6200	7890	45000	8.4	2685	161.2	90	360	38380	10.9	24	24	62.5	13.32	1	8.4	2	160	46.6	736.825	7.385	40.97	6.18	2.97	-0.05	-0.01	-0.02	-0.02	-0.1	0.045	2	0.55	-0.2	605	3.86	64.55	11.08
	Detection Limit				100	0.1	50	1	5	5000	200	1000	100	10	2000	0.5	20	0.5	1	2	20	0.2	0.5	0.5	0.5	0.05	0.05	0.5	1	10	0.05	0.05	0.05	0.1	0.05	0.05	0.05	0.005	0.01	0.02	0.1	0.02	0.1	0.2	0.5	2	0.05	0.2	0.05
2	141415	Ca-rich eolian sand	10	30	-100	1	13950	122006	62015	225000	200	30000	7600	7990	34000	9.5	3100	153.5	75	412	36320	10.6	21.5	27	57.5	13.05	0.95	7.5	1	130	42.1	887.15	8.2	44.1	6.8	3.05	-0.05	-0.005	-0.01	-0.02	-0.1	0.04	1.9	0.4	-0.5	582	3.35	73	14.2
2	141415	Ca-rich eolian sand	10	30	-100	1.1	12300	133846	55760	225000	200	27000	7800	7250	36000	9	2800	141.5	86	356	34840	10	21	25	54.5	11.85	0.9	7	1	120	40.3	1624.7	7.1	40.8	6.9	2.75	-0.05	-0.005	-0.01	-0.02	-0.1	0.04	1.7	0.4	-0.5	572	3.1	86	11.65
2	141415	Ca-rich eolian sand	10	30	-100	0.9	13500	136225	60990	220000	200	28000	7700	8270	30000	10.5	2540	145	76	350	34000	11.8	22	28.5	52.5	12.45	1	7.5	2	130	40.9	657.85	8.75	46.1	6.35	3.1	-0.05	-0.005	-0.01	-0.02	-0.1	0.04	1.8	0.4	-0.5	608	3.2	67.6	13
	Detection Limit				50	0.05	10	1	2	2000	100	1000	100	10	1000	0.2	5	0.2	0.5	2	5	0.05	0.1	2	0.5	0.02	0.05	0.2	1	10	0.1	0.005	0.005	0.01	0.005	0.01	0.05	0.01	0.02	0.02	0.1	0.005	0.1	0.05	0.2	5	0.02	0.05	0.005
1	Filter paper				-50	-0.05	60	34	74	-2000	-100	-1000	200	20	2000	0.4	-5	-0.2	83	-2	200	0.1	1.5	2	54	0.02	-0.05	-0.2	-1	-10	-0.1	1.39	0.025	5.84	0.03	0.09	-0.05	-0.01	-0.02	0.06	0.4	-0.005	0.2	-0.05	-0.2	-5	-0.02	0.4	0.04
1	Filter paper				-50	-0.05	20	15	20	-2000	-100	-1000	-100	20	1000	0.4	-5	-0.2	513	-2	160	-0.05	1.4	-2	8	-0.02	-0.05	-0.2	-1	-10	-0.1	0.975	-0.005	0.03	0.03	0.02	-0.05	-0.01	-0.02	-0.02	-0.1	0.03	0.1	0.1	-0.2	-5	-0.02	0.7	0.005
1	Filter paper				-50	-0.05	10	14	76	-2000	-100	-1000	-100	30	1000	0.4	-5	-0.2	35.5	-2	45	0.05	1.2	-2	13.5	-0.02	-0.05	-0.2	-1	-10	-0.1	0.91	-0.005	0.03	0.025	0.03	-0.05	-0.01	-0.02	-0.02	-0.1	-0.005	-0.1	0.05	-0.2	-5	-0.02	0.3	0.01
	Detection Limit				100	0.1	50	1	5	5000	200	1000	100	10	2000	0.5	20	0.5	1	2	20	0.2	0.5	0.5	0.5	0.05	0.05	0.5	1	10	0.05	0.05	0.05	0.1	0.05	0.05	0.05	0.005	0.01	0.02	0.1	0.02	0.1	0.2	0.5	2	0.05	0.2	0.05
2	Filter paper				-100	-0.1	-50	21	1335	-5000	-200	-1000	-100	20	-2000	0.5	-20	-0.5	98	2	60	-0.2	1.5	1	4	-0.05	-0.05	-0.5	-1	-10	0.55	0.75	-0.05	0.2	0.05	-0.05	-0.05	-0.005	-0.01	-0.02	-0.1	-0.02	-0.1	-0.2	-0.5	-2	-0.05	0.8	-0.05
2	Filter paper				-100	-0.1	-50	22	40	-5000	-200	-1000	-100	40	-2000	0.5	-20	-0.5	30	-2	180	-0.2	1.5	2	1.5	0.05	-0.05	-0.5	-1	-10	0.15	0.55	-0.05	0.4	0.1	-0.05	-0.05	-0.005	-0.01	-0.02	-0.1	-0.02	0.8	-0.2	-0.5	-2	-0.05	0.6	-0.05
2	Filter paper				-100	-0.1	-50	22	40	-5000	-200	-1000	-100	10	-2000	-0.5	-20	-0.5	52	-2	-20	-0.2	1.5	-0.5	19	-0.05	-0.05	-0.5	-1	-10	-0.05	0.55	-0.05	0.2	-0.05	-0.05	-0.05	-0.005	-0.01	-0.02	-0.1	-0.02	0.1	0.2	-0.5	-2	-0.05	0.8	-0.05
	Detection Limit				50	0.05	10	1	2	2000	100	1000	100	10	1000	0.2	5	0.2	0.5	2	5	0.05	0.1	2	0.5	0.02	0.05	0.2	1	10	0.1	0.005	0.005	0.01	0.005	0.01	0.05	0.01	0.02	0.02	0.1	0.005	0.1	0.05	0.2	5	0.02	0.05	0.005
1	141415	Ca-rich eolian sand	2.5	30	-50	1.15	15220	101233	73536	230000	400	15000	8800	8440	49000	10.6	2320	168.2	132	428	35470	12.9	25.4	26	75.5	14.1	1	9.4	1	120	51.1	974.99	10.495	64.6	6.5	3.42	-0.05	-0.01	-0.02	-0.02	-0.1	0.055	2.3	0.5	-0.2	695	4.32	76.9	18.745
1	141415	Ca-rich eolian sand	2.5	30	-50	1.3	18360	103810	69216	222000	400	29000	9300	8620	46000	11.2	2685	167.2	416	578	35895	13.3	29.5	28	74.5	16.02	1.15	10.8	2	120	53.5	856.425	10.32	58.73	7.285	3.59	-0.05	-0.01	-0.02	-0.02	-0.1	0.055	2.4	0.8	-0.2	650	4.2	81.4	14.305
1	141415	Ca-rich eolian sand	2.5	30	-50	1.15	15760	106362	70252	216000	400	23000	8700	9640	53000	10	5100	178.2	214.5	348	38465	13.4	26.2	30	74.5	14	1.15	9.4	2	140	49	1255.44	9.41	54.77	5.76	3.43	-0.05	0.01	-0.02	0.02	-0.1	0.04	2.5	0.55	-0.2	685	4.54	80.6	16.025
	Detection Limit				100	0.1	50	1	5	5000	200	1000	100	10	2000	0.5	20	0.5	1	2	20	0.2	0.5	0.5	0.5	0.05	0.05	0.5	1	10	0.05	0.05	0.05	0.1	0.05	0.05	0.05	0.005	0.01	0.02	0.1	0.02	0.1	0.2	0.5	2	0.05	0.2	0.05
2	141415	Ca-rich eolian sand	2.5	30	-100	1	15150	131493	64335	225000	400	25000	9800	6860	22000	11.5	3020	158.5	283	396	32800	12.2	25.5	26.5	59.5	14.2	0.85	7.5	2	100	41.9	1534.8	9.85	60.7	6.3	2.65	-0.05	-0.005	-0.01	0.02	-0.1	0.04	2.1	0.6	-0.5	624	3.5	73.8	15.1
2	141415	Ca-rich eolian sand	2.5	30	-100	1.1	17500	129930	58425	235000	400	20000	10400	7130	18000	10.5	2360	157	228	412	33080	9.6	27	31.5	59.5	13.65	0.95	7.5	1	100	41.25	1012.7	10.05	53.1	5.85	2.8	-0.05	0.005	-0.01	0.04	-0.1	0.06	2.2	0.4	-0.5	628	3.65	96.8	17.95
2	141415	Ca-rich eolian sand	2.5	30	-100	1.1	15200	128311	67515	230000	200	20000	9500	8030	26000	11	2780	162.5	337	352	31740	10.4	27	26	56	12.85	0.95	8	1	100	43.15	955.6	14.6	68.5	5.6	3.15	-0.05	0.005	-0.01	-0.02	-0.1	0.04	2.1	0.6	-0.5	620	3.35	74	23.65
	Detection Limit				50	0.05	10	1	2	2000	100	1000	100	10	1000	0.2	5	0.2	0.5	2	5	0.05	0.1	2	0.5	0.02	0.05	0.2	1	10	0.1	0.005	0.005	0.01	0.005	0.01	0.05	0.01	0.02	0.02	0.1	0.005	0.1	0.05	0.2	5	0.02	0.05	0.005
1	Filter paper				-50	-0.05	60	34	74	-2000	-100	-1000	200	20	2000	0.4	-5	-0.2	83	-2	200	0.1	1.5	2	54	0.02	-0.05	-0.2	-1	-10	-0.1	1.39	0.025	5.84	0.03	0.09	-0.05	-0.01	-0.02	0.06	0.4	-0.005	0.2	-0.05	-0.2	-5	-0.02	0.4	0.04
1	Filter paper				-50	-0.05	20	15	20	-2000	-100	-1000	-100	20	1000	0.4	-5	-0.2	513	-2	160	-0.05	1.4	-2	8	-0.02	-0.05	-0.2	-1	-10	-0.1	0.975	-0.005	0.03	0.03	0.02	-0.05	-0.01	-0.02	-0.02	-0.1	0.03	0.1	0.1	-0.2	-5	-0.02	0.7	0.005
1	Filter paper				-50	-0.05	10	14	76	-2000	-100	-1000	-100	30	1000	0.4	-5	-0.2	35.5	-2	45	0.05	1.2	-2	13.5	-0.02	-0.05	-0.2	-1	-10	-0.1	0.91	-0.005	0.03	0.025	0.03	-0.05	-0.01	-0.02	-0.02	-0.1	-0.005	-0.1	0.05	-0.2	-5	-0.02	0.3	0.01
	Detection Limit				100	0.1	50	1	5	5000	200	1000	100	10	2000	0.5	20	0.5	1	2	20	0.2	0.5	0.5	0.5	0.05	0.05	0.5	1	10	0.05	0.05	0.05	0.1	0.05	0.05	0.05	0.005	0.01	0.02	0.1	0.02	0.1	0.2	0.5	2	0.05	0.2	0.05
2	Filter paper				-100	-0.1	-50	21	1335	-5000	-200	-1000	-100	20	-2000	0.5	-20	-0.5	98	2	60	-0.2	1.5	1	4	-0.05	-0.05	-0.5	-1	-10	0.55	0.75	-0.05	0.2	0.05	-0.05	-0.05	-0.005	-0.01	-0.02	-0.1	-0.02	-0.1	-0.2	-0.5	-2	-0.05	0.8	-0.05
2	Filter paper				-100	-0.1	-50	22	40	-5000	-200	-1000	-100	40	-2000	0.5	-20	-0.5	30	-2	180	-0.2	1.5	2	1.5	0.05	-0.05	-0.5	-1	-10	0.15	0.55	-0.05	0.4	0.1	-0.05	-0.05	-0.005	-0.01	-0.02	-0.1	-0.02	0.8	-0.2	-0.5	-2	-0.05	0.6	-0.05
2	Filter paper				-100	-0.1	-50	22	40	-5000	-200	-1000	-100	10	-2000	-0.5	-20	-0.5	52	-2	-20	-0.2	1.5	-0.5	19	-0.05	-0.05	-0.5	-1	-10	-0.05	0.55	-0.05	0.2	-0.05	-0.05	-0.05	-0.005	-0.01	-0.02	-0.1	-0.02	0.1	0.2	-0.5	-2	-0.05	0.8	-0.05
	Detection Limit				50	0.05	10	1	2	2000	100	1000	100	10	1000	0.2	5	0.2	0.5	2	5	0.05	0.1	2	0.5	0.02	0.05	0.2	1	10	0.1	0.005	0.005	0.01	0.005	0.01	0.05	0.01	0.02	0.02	0.1	0.005	0.1	0.05	0.2	5	0.02	0.05	0.005
1	141498	Fe-rich lacustrine	2.5	60	100	2.25	3910	20491	115878	260000	600	7000	1700	21490	11000	16.2	8615	195.6	169.5	1330	80170	26.4	40.2	46	101	28.8	1.85	14.6	2	50	162.9	508.59	17.975	191.04	24.25	4.36	-0.05	-0.01	-0.02	0.04	-0.1	0.095	4.8	1.25	-0.2	280	8.38	316.15	27.215
1	141498	Fe-rich lacustrine	2.5	60	-50	2.3	3710	15748	131042	242000	600	7000	1700	22410	10000	17.4	7910	190	169	1180	81070	25.75	41.4	46	100.5	28.8	1.8	14.2	1	50	168	407.91	21.78	232.23	24.35	4.77	-0.05	-0.01	-0.02	0.06	-0.1	0.1	4.6	1.4	-0.2	290	8.26	308.45	32.615
1	141498	Fe-rich lacustrine	2.5	60	-50	2.1	3910	17499	128768	246000	600	7000	1700	21270	9000	16.4	7215	188.8	304	1344	80785	28.55	39.6	42	99.5	26.96	1.75	13.6	2	40	156	401.045	20.435	131	22.185	4.32	-0.05	-0.01	-0.02	0.04	-0.1	0.095	4.4	1.3	-0.2	405	8.04	296.5	31.84
	Detection Limit				100	0.1	50	1	5	5000	200	1000	100	10	2000	0.5	20	0.5	1	2	20	0.2	0.5	0.5	0.5	0.05	0.05	0.5	1	10	0.05	0.05	0.05	0.1	0.05	0.05	0.05	0.005	0.01	0.02	0.1	0.02	0.1	0.2	0.5	2	0.05	0.2	0.05
2	141498	Fe-rich lacustrine	2.5	60	-100	2.1	4200	24692	115890	265000	600	6000	1800	18340	4000	17.5	7660	174	123	1372	76680	28	37.5	44.5	80	26.7	1.6	11.5	2	30	133.35	287.6	17.4	187.9	22.65	3.95	-0.05	-0.005	-0.01	0.04	-0.1	0.08	4.4	1	-0.5	242	6.75	292.2	24.85
2	141498	Fe-rich lacustrine	2.5	60	-100	2.1	3700	22441	125130	255000	600	7000	1800	19320	4000	19.5	7800	194	133	1346	81160	28.8	39	46	85	27.8	1.6	11.5	2	30	142.3	618.45	21.25	144.3	21.3	4.65	-0.05	-0.005	-0.01	0.04	-0.1	0.08	4.3	1.2	-0.5	240	6.7	302	29.5
2	141498	Fe-rich lacustrine	2.5	60	-100	2.1	3650	22460	129785	245000	600	7000	1700	18200	4000	19	7540	184	143	1288	79340	26.2	38	45.5	79	27	1.6	11	2	30	135.55	487.05	19.85	271.8	21.95	4.2	-0.05	-0.005	-0.01	0.02	-0.1	0.08	4.3	1	-0.5	216	6.7	308.8	30.5
[truncated: 27 more columns]
